# Supplementary material
Source: PubMed Central journal article supplement (PMC4636461)
Supplement: NIHMS719380-supplement-1.pdf [file NIHMS719380-supplement-1.pdf]

Supplementary Figure 1

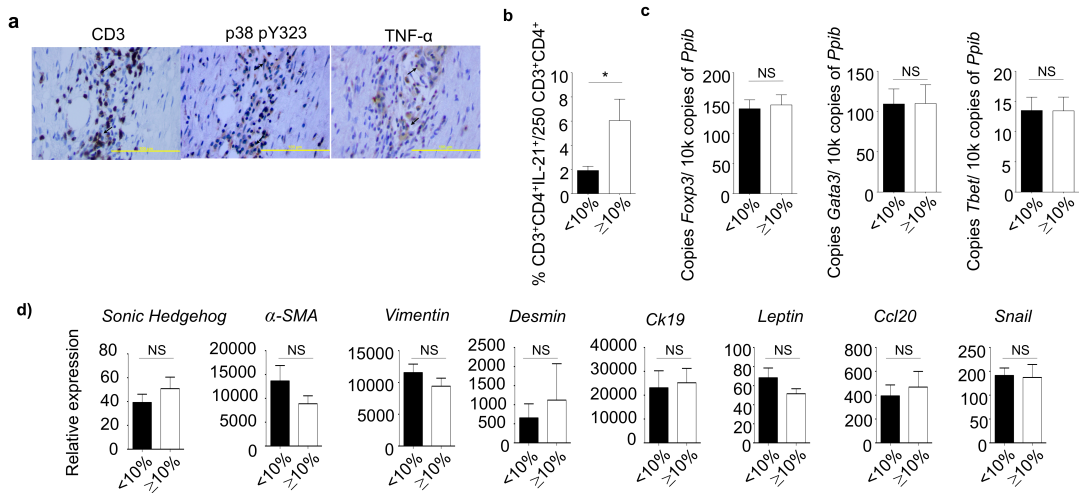

**Supplementary Fig. 1. p38 alternative activation, IL-21 expression, and T helper cell transcription factors in PDAC tissue.**

(a) Tissue microarrays of pancreatic tissue from 192 patients with pancreatic ductal adenocarcinoma were stained for CD3, p38 pY323, and TNF $\alpha$  in serial sections. A representative slide is shown, and arrowheads indicate positive cells.

(b) The average percentage of CD3<sup>+</sup>CD4<sup>+</sup>IL21<sup>+</sup> cells in patient samples with <10% (n=10) versus  $\geq$ 10% (n=10) numbers of TIL with alternatively activated p38 (\*  $P < 0.05$ , nonparametric Mann-Whitney test).

(c) Quantitative RT-PCR for the expression of *Foxp3*, *Gata3*, and *Tbet* in patient samples with <10% versus  $\geq$ 10% TIL with alternatively activated p38 (n=16 patients per group).

(d) Quantitative RT-PCR for the expression of *SHH*,  $\alpha$ -*SMA*, *Vimentin*, *Desmin*, *Ck19*, *Leptin*, *Ccl20*, and *Snail* in patient samples with <10% (black bar) versus  $\geq$ 10% (white bar) TIL with alternatively activated p38 (n=16 patients per group). NS=not significant, nonparametric Mann-Whitney test. Results are shown as average  $\pm$  SEM.

Supplementary Figure 2

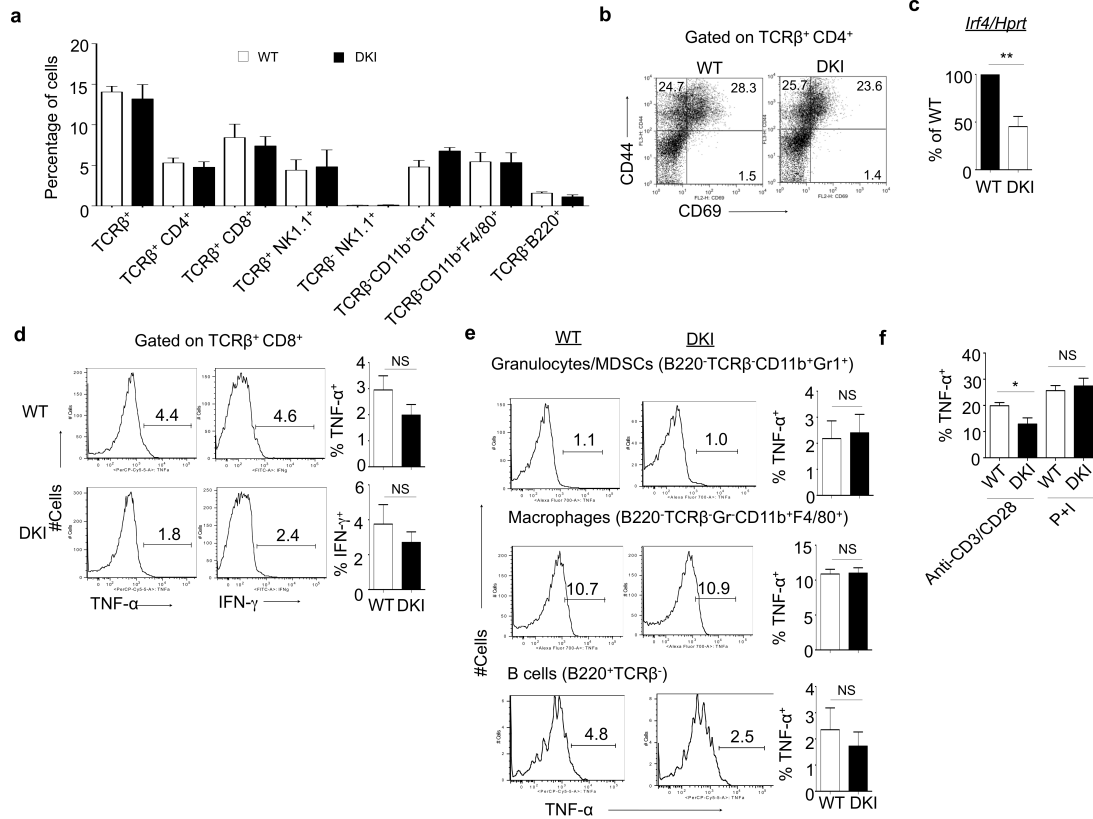

**Supplementary Fig. 2. T cell secreted cytokines controlled by the p38 alternative pathway enhances pancreatic tumor growth.**

(a, b, c) Panc02 cells were injected into WT and DKI mice and tumors harvested at day 28. (a) TIL subpopulations tumor were analyzed (n=5 mice per group). (b) Activation markers CD44 and CD69 of CD4<sup>+</sup> TIL are shown (n=4 mice per group). (c) Expression of *Irf4* mRNA in CD4<sup>+</sup> TIL was determined as percent of WT by quantitative real-time PCR.

(d) TNFα and IFNγ production by infiltrating CD8<sup>+</sup> T cells was determined at day 28 after Panc02 cell injection. The bar graphs indicate the average percentages ± SEM (n=6 mice per group; NS = not significant, nonparametric Mann-Whitney test).

(e) TNFα secretion of different cell populations in tumor-infiltrating cells was analyzed at day 28 after injection of Panc02 cells. The bar graphs indicate the averages ± SEM (n=5 (11R) Scr and n=4 (11R) 71-85; NS= not significant, nonparametric Mann-Whitney test).

(f) CD4<sup>+</sup> Panc02 TIL harvested at 28 days from WT and DKI mice were stimulated with anti-CD3/CD28 or PMA and ionomycin for 4 hr in the presence of monensin and analyzed for intracellular TNFα expression. The bar graphs represent the average ± SEM of 10 mice per group (\*P < 0.05, NS=not significant, nonparametric Mann-Whitney test).

Supplementary Figure 3

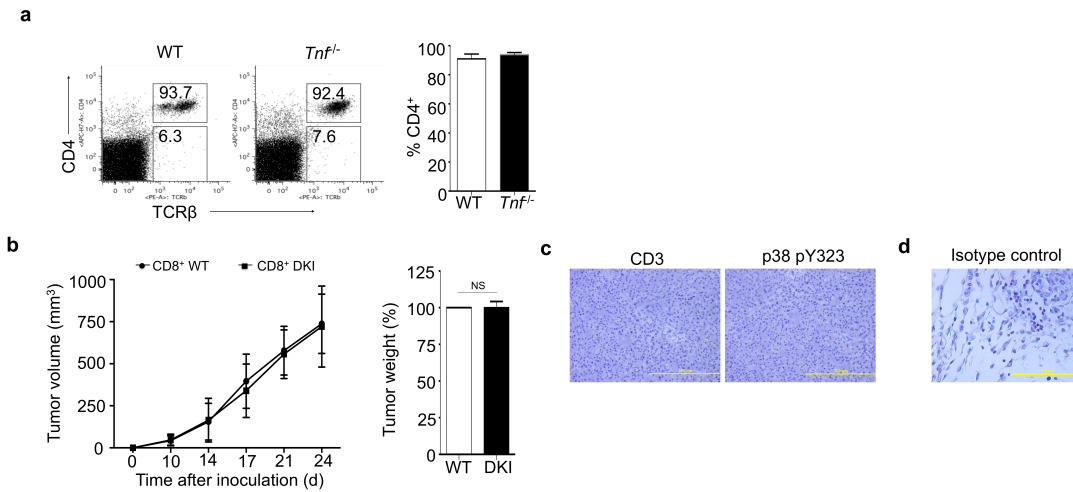

**Supplementary Fig. 3. Equal CD4<sup>+</sup> T cell engraftment between WT and TNF $\alpha$ <sup>-/-</sup> mice and similar pancreatic tumor growth in mice with WT or DKI CD8<sup>+</sup> T cells.** (a) CD4<sup>+</sup> T cells were purified from spleens and lymph nodes of WT or TNF $\alpha$ <sup>-/-</sup> mice and adoptively transferred into TCR $\alpha$ <sup>-/-</sup> mice. Successful CD4<sup>+</sup> T cell engraftment in the spleen was determined on the day of harvest. The bar graph represent the average percentage of CD4<sup>+</sup> T cells  $\pm$  SEM (n=3 mice per group). (b) Purified CD8<sup>+</sup> T cells from WT or DKI mice were adoptively transferred into TCR $\alpha$ <sup>-/-</sup> mice. Ten days later, Panc02 cells were injected and tumor volume followed over time and weight, expressed as percent of WT, determined at 24 days (n=3 mice per group; one sample t-test). Results are shown as average  $\pm$  SEM. (c) Areas of healthy pancreatic tissue of KPC mice were stained by immunohistochemistry for CD3 and pY323 p38 to detect T cells with p38 activated by the alternative pathway (d) A T-cell-rich area in a KPC PDAC sample stained with only secondary antibody.

Supplementary Figure 4

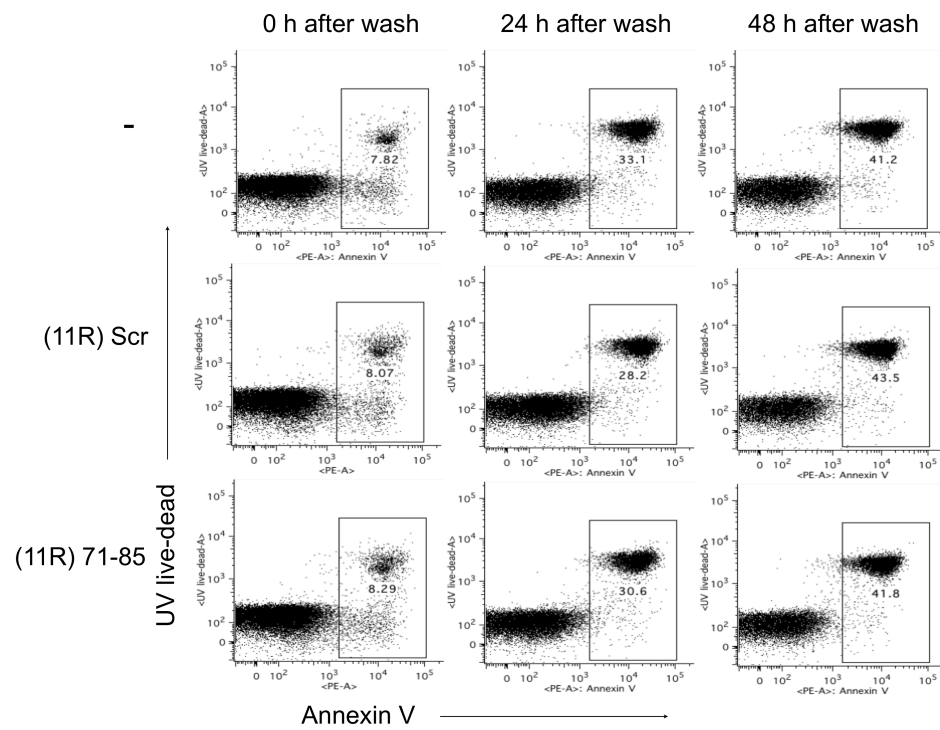

**Supplementary Fig. 4. (11R) 71-85 was not toxic for primary cells.** Purified splenic T cells were treated or not with (11R) 71-85 or (11R) Scr for 2 h, washed, and cultured for the indicated times at which apoptosis was measured with Annexin V.

Supplementary Figure 5

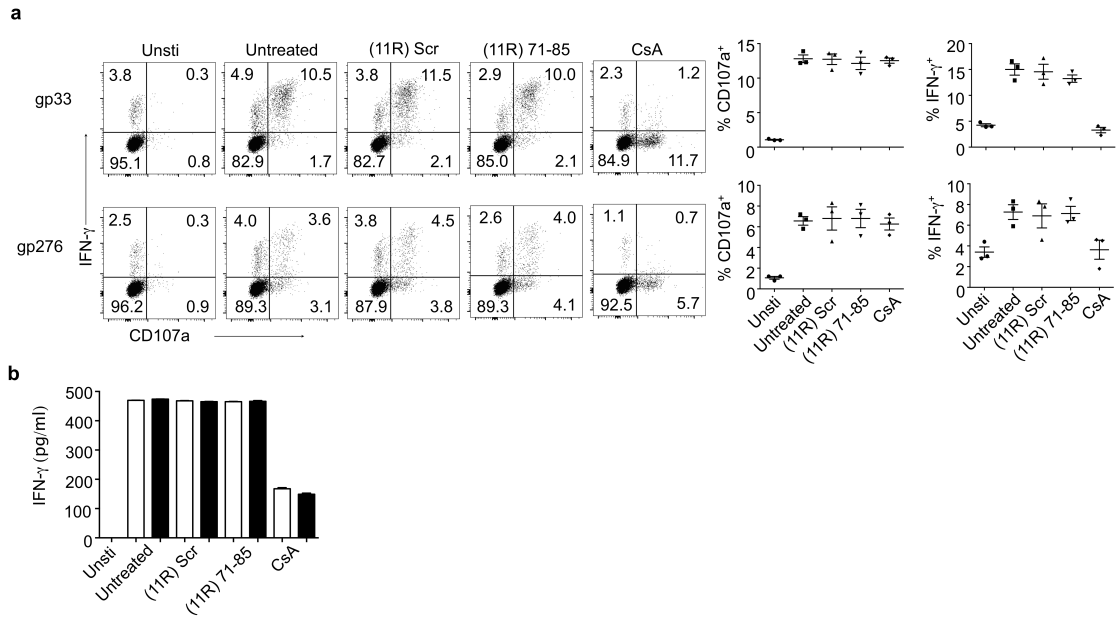

**Supplementary Fig. 5. Affect of (11R) 71-85 on CTL and Th1 function.**

**(a)** Splenocytes from 8-day LCMV infected WT mice (n=3) were treated with medium alone, (11R) Scr, (11R) 71-85, or cyclosporin A (CsA) and stimulated with gp33 or gp276. Cells were analyzed for CD107a and IFN $\gamma$  expression by flow-cytometry. The data from individual mice and the average  $\pm$  SEM are shown on the right.

**(b)** Naïve CD4<sup>+</sup> T cells were skewed towards Th1 in vitro, treated as in **a**, and then stimulated with anti-CD3/CD28 or PMA/ionomycin. IFN $\gamma$  secretion were measured by ELISA. Results are shown as average  $\pm$  SEM of two independent experiments.

Supplementary Figure 6

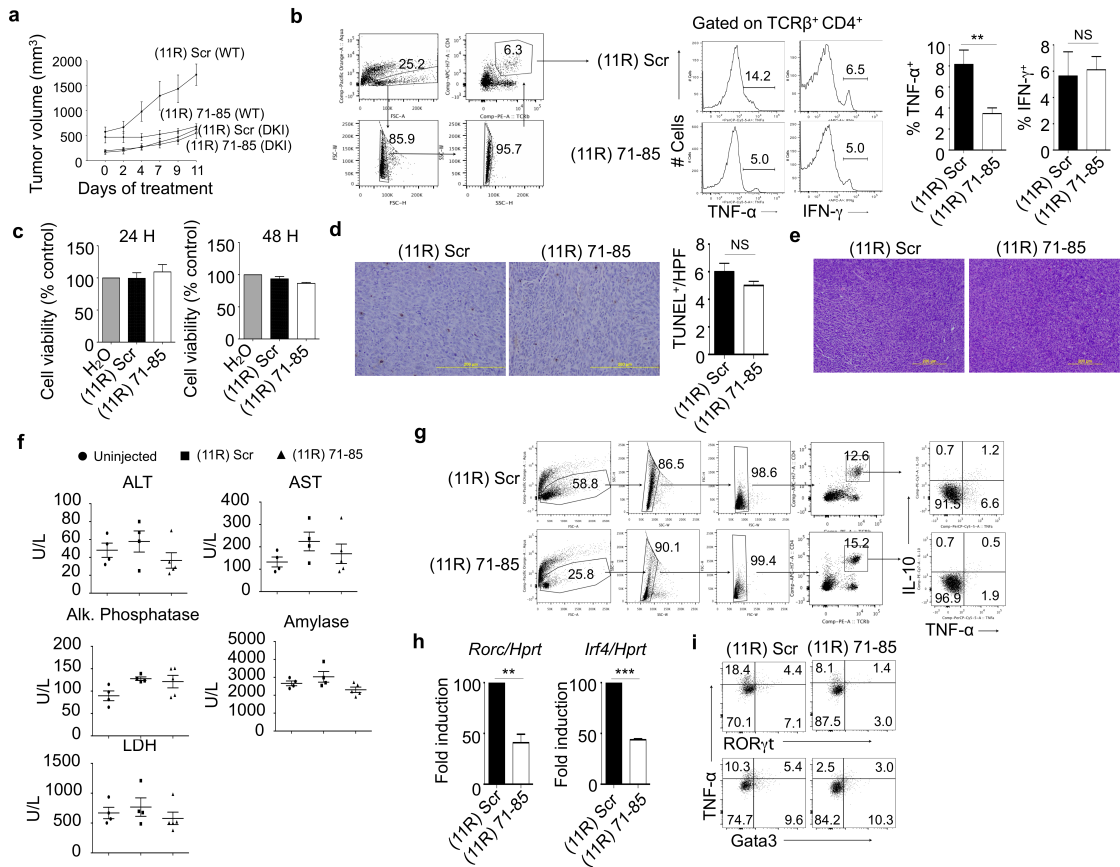

**Supplementary Fig. 6. (11R) 71-85 impaired CD4<sup>+</sup> T cell functions without affecting tumor cells.**

(a) Panc02 cells were injected into WT or DKI mice and allowed to grow to an estimated volume of 300 mm<sup>3</sup>. Intratumor injections were performed 3 times a week with (11R) Scr or (11R) 71-85 for 11 days and tumor volume was monitored (n=3 mice per group).

(b) B6 mice were inoculated with Panc02 cells and treated as in a. Tumor infiltrating CD4<sup>+</sup> T cells from (11R) 71-85 or (11R) Scr treated mice were analyzed 24 hr after the final injection for intracellular expression of TNF $\alpha$  and IFN $\gamma$  (histograms). Bar graphs on the right show the average percentage of cytokine-secreting cells (n=5 mice per group; \*P < 0.05, NS=not significant, nonparametric Mann-Whitney test).

(c) Cell viability of Panc02 cells was determined by MTT-assay after incubation with H<sub>2</sub>O, (11R) Scr, or (11R) 71-85 in a time and dose dependent manner. Data are representative of 4 independent experiments performed in triplicate (Wilcoxon-signed Rank test, hypothetical value of control 100%).

(d) Panc02 cells were injected in B6 mice and allowed to grow to an estimated volume of 300 mm<sup>3</sup>. The mice were treated 3 times a week with H<sub>2</sub>O, (11R) Scr, or (11R) 71-85 for 2 weeks, and paraffin tissue sections were evaluated for apoptosis using an enzymatic TUNEL assay (n=3, NS=not significant, nonparametric Mann-Whitney test).

(e) B6 mice were injected with Panc02 cells as in a and the presence of necrosis was determined by examination of H&E sections ((11R) Scr, n=4, and (11R) 71-85, n=8).

Results from **a-e** are shown as the average  $\pm$  SEM.

**(f)** Wild type B6 mice were intravenously injected 3 times a week with (11R) Scr, (11R) 71-85 or left uninjected for 3.5 weeks. Twenty-four hours after last injection serum samples were collected and measured for the amount of different enzymes (n=4 mice per group).

**(g)** KPC mice were treated with either (11R) Scr or (11R) 71-85 for 3.5 weeks starting at the age of 9 weeks. Twenty-four hours after the final injection infiltrating CD4<sup>+</sup> T cells from mice treated with (11R) 71-85 or (11R) Scr were analyzed for intracellular cytokines (TNF $\alpha$  and IL-10 are shown as an example).

**(h)** KPC mice were treated as in **g** and 24 hr after the final injection, *Rorc* (n=3) and *Irf4* (n=5) mRNA expression was determined in CD4<sup>+</sup> TIL by quantitative real-time PCR. For *Rorc*, the results are from a pool of 3 mice in each group with qPCR performed in triplicate. For *Irf4*, three mice were pooled per group, and two groups of (11R) Scr-treated mice and one group of (11R) 71-85 treated mice were analyzed. Expression of *Rorc* and *Irf4* mRNA in (11R) 71-85-treated CD4<sup>+</sup> TIL was determined as a percent of (11R) Scr-treated cells by quantitative real-time PCR. The data are an average of the replicate samples  $\pm$  SEM (\**p*<0.05, unpaired two-tailed Student's *t*-test).

**(i)** KPC mice were treated as in **g** and 24 hr after the final injection infiltrating CD4<sup>+</sup> T cells from mice treated with (11R) 71-85 or (11R) Scr were analyzed for intracellular TNF $\alpha$ , Gata3, and ROR $\gamma$ t (n=4 mice per group).

Supplementary Figure 7

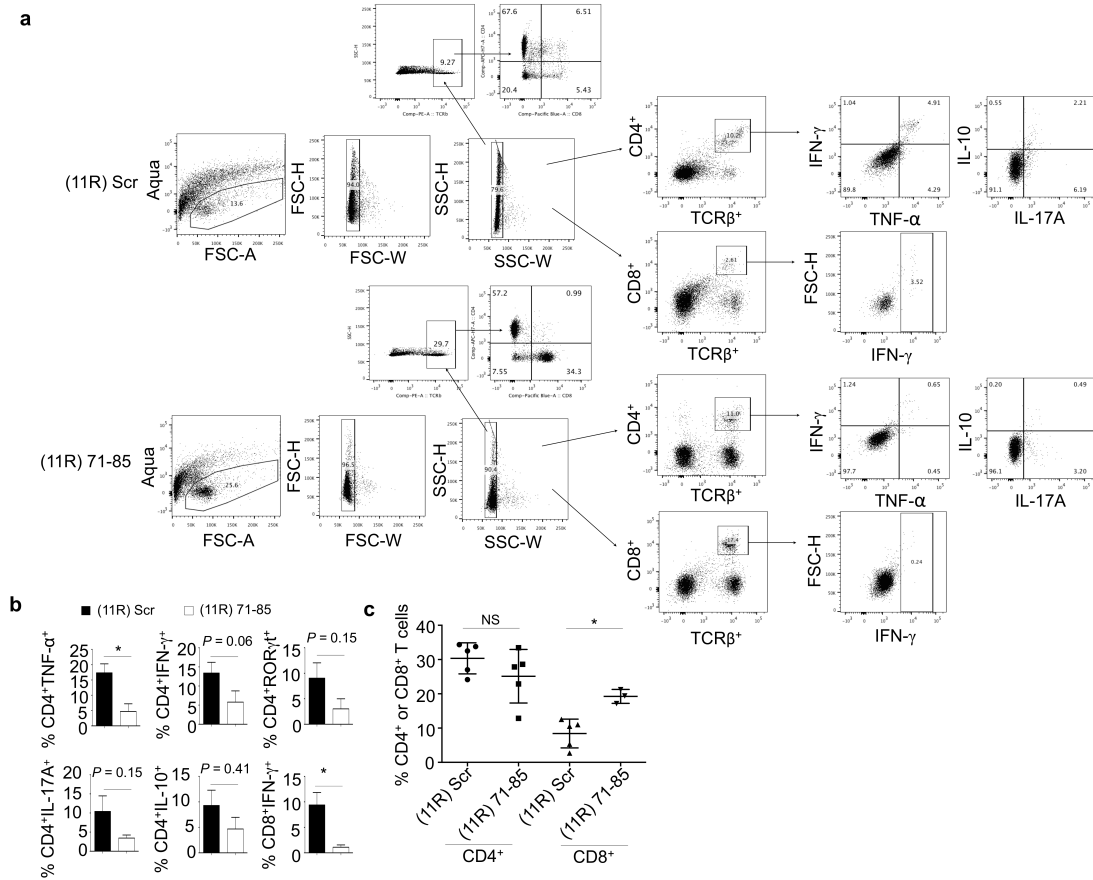

**Supplementary Fig. 7. (11R) 71-85 impaired CD4<sup>+</sup> T cell inflammatory cytokines and increased CD8<sup>+</sup>/CD4<sup>+</sup> ratio in KPC tumors.**

**(a)** Gating strategy for flow cytometric analysis.

**(a and b)** KPC mice were screened by palpation for the presence of pancreatic masses, and mice with tumors of < 150 mm<sup>3</sup> as confirmed by ultrasound were used. The animals were treated with either (11R) 71-85 or (11R) Scr i.v. every other day 3 times and analyzed (n=5 mice per group except for CD8<sup>+</sup> IFN $\gamma$ , where n=3 in the (11R) 71-85 group). \* *P* < 0.05, nonparametric Mann-Whitney test.

**(c)** KPC mice were treated as in **b** and the percentages of CD4<sup>+</sup> and CD8<sup>+</sup> T cells were calculated. Each symbol represents an individual animal. \* *P* < 0.05, nonparametric Mann-Whitney test.



**Supplementary Table 1: Characteristics of 192 PDACs**

| <b>Parameter</b>                        | <b>Total<br/>(N=192)</b> | <b>pY323 &lt;10%<br/>(N=153)</b> | <b>pY323 ≥10%<br/>(N=39)</b> | <b>P-value</b> |
|-----------------------------------------|--------------------------|----------------------------------|------------------------------|----------------|
| <b>Gender</b>                           |                          |                                  |                              | 0.8575         |
| male                                    | 103 (53.6%)              | 83 (54.2%)                       | 20 (51.3%)                   |                |
| female                                  | 89 (46.4%)               | 70 (45.8%)                       | 19 (48.7%)                   |                |
| <b>Age [years]*</b>                     | 65.5 (58.4 – 71.1)       | 65.5 (58.1 – 70.8)               | 66.9 (60.1 – 72.8)           | 0.4031         |
| <b>T category</b>                       |                          |                                  |                              |                |
| pT 3                                    | 192 (100.0%)             | 153 (100.0%)                     | 39 (100.0%)                  |                |
| <b>N category</b>                       |                          |                                  |                              | 0.1885         |
| pN 0                                    | 26 (13.5%)               | 18 (11.8%)                       | 8 (20.5%)                    |                |
| pN 1                                    | 166 (86.5%)              | 135 (88.2%)                      | 31 (79.5%)                   |                |
| <b>No pos. lymph nodes (N1 tumors)*</b> | 5 (2 – 8)                | 5 (2 – 8)                        | 4 (2 – 9)                    | 0.6068         |
| <b>M category</b>                       |                          |                                  |                              | 0.6901         |
| M 0                                     | 182 (94.8%)              | 144 (94.1%)                      | 38 (97.4%)                   |                |
| M 1                                     | 10 (5.2%)                | 9 (5.9%)                         | 1 (2.6%)                     |                |
| <b>UICC stage</b>                       |                          |                                  |                              | 0.3423         |
| UICC IIA                                | 26 (13.5%)               | 18 (11.8%)                       | 8 (20.5%)                    |                |
| UICC IIB                                | 156 (81.3%)              | 126 (82.4%)                      | 30 (76.9%)                   |                |
| UICC IV                                 | 10 (5.2%)                | 9 (5.9%)                         | 1 (2.6%)                     |                |
| <b>Grading</b>                          |                          |                                  |                              | 0.7629         |
| G 1                                     | 4 (2.1%)                 | 4 (2.6%)                         | 0 (0.0%)                     |                |
| G 2                                     | 120 (62.5%)              | 94 (61.4%)                       | 26 (66.7%)                   |                |
| G 3                                     | 68 (35.4%)               | 55 (36.0%)                       | 13 (33.3%)                   |                |
| <b>R-classification</b>                 |                          |                                  |                              | 0.7127         |
| R 0                                     | 42 (21.9%)               | 31 (20.3%)                       | 11 (28.2%)                   |                |
| R 1                                     | 138 (71.9%)              | 112 (73.2%)                      | 26 (66.7%)                   |                |
| R 2                                     | 10 (5.2%)                | 8 (5.2%)                         | 2 (5.1%)                     |                |
| R x                                     | 2 (1.0%)                 | 2 (1.3%)                         | 0 (0.0%)                     |                |
| <b>Tumor size [cm]*</b>                 | 3.0 (2.5 – 3.5)          | 3.0 (2.5 – 3.5)                  | 3.0 (2.5 – 3.5)              | 0.1263         |

\*Presented as median with (interquartile range).

**Supplementary Table 2.** Multivariate Cox regression analysis of overall survival for 190 patients with PDAC (Likelihood ratio test with  $p < 0.0001$ ; 2 patients with Rx were excluded).

| Multivariate Cox regression analysis |                          |            |                  |
|--------------------------------------|--------------------------|------------|------------------|
| Factor                               | Strata                   | P-value    | HR (95%CI)       |
| pY323                                | $\geq 10\%$ vs. $< 10\%$ | $< 0.0001$ | 2.18 (1.49-3.19) |
| Grading                              | G3 vs. G1/G2             | 0.0281     | 1.43 (1.04-1.98) |
| M                                    | 1 vs. 0                  | 0.0146     | 2.36 (1.18-4.70) |
| positive LN                          | $\geq 8$ vs. $0 / < 8$   | 0.0011     | 1.79 (1.26-2.53) |
|                                      |                          |            |                  |

Not included: R2 ( $p=0.2670$ ), R1 (0.3662), Age  $\geq 70$  years (0.2775), 2-7 positive LNs ( $p=0.5521$ ), 1 positive LN ( $p=0.3166$ )

**Supplementary Table 3.** Multivariate Cox regression analysis of overall survival for 164 patients with PDAC (Likelihood ratio test with  $p = 0.0002$ ; 28 patients were excluded because of tumor extent (R2/Rx, M1;  $N=16$ ), in hospital mortality ( $N=8$ ) and lost to follow-up ( $N=4$ ).

| Factor      | Strata                   | P-value | HR (95%CI)       |
|-------------|--------------------------|---------|------------------|
|             |                          |         |                  |
| pY323       | $\geq 10\%$ vs. $< 10\%$ | 0.0017  | 1.98 (1.29-3.04) |
| Grading     | G3 vs. G1/G2             | 0.0317  | 1.46 (1.03-2.06) |
| positive LN | $\geq 8$ vs. $0 < 8$     | 0.0006  | 1.91 (1.32-2.77) |

Not included: R1 (0.2984), Age  $\geq 70$  years (0.3236), 2-7 positive LNs ( $p=0.4357$ ), 1 positive LN ( $p=0.2641$ )
